# Supplementary material for: Evidence for genetic regulation of the human parieto‐occipital 10‐Hz rhythmic activity
Source: PubMed Central journal article supplement — Eur J Neurosci. 2016 Jul 4;44(3):1963–71. doi: 10.1111/ejn.13300 (PMC5113795; doi:10.1111/ejn.13300), 2016-07-04
Supplement: EJN-44-1963-s001.pdf [file EJN-44-1963-s001.pdf]

## Supporting Information

Salmela, Renvall, et al.: Evidence for genetic regulation of the human parieto-occipital 10-Hz rhythmic activity

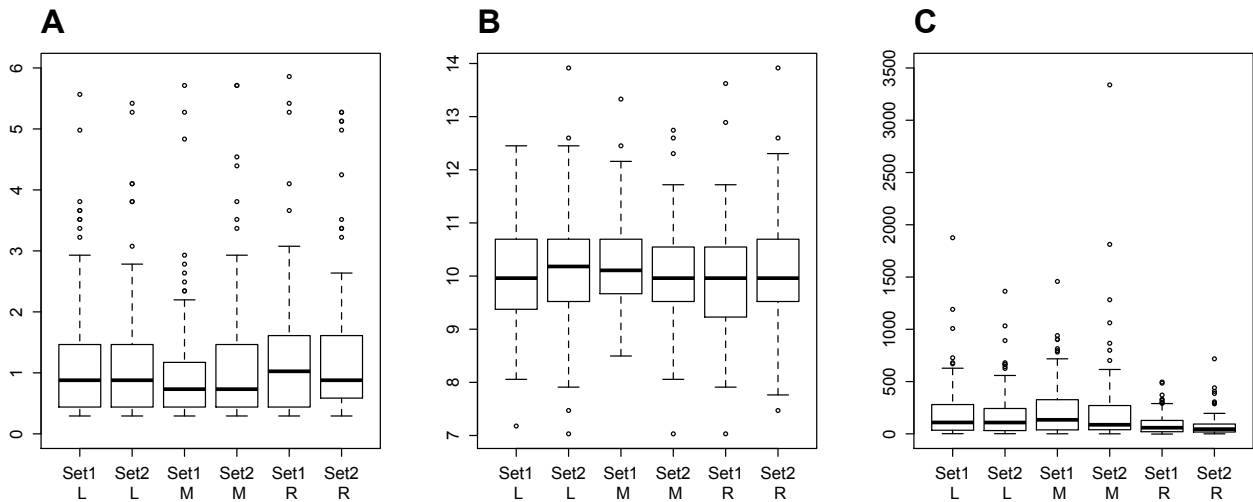

**Supplementary Figure 1.** Distributions of the phenotype measurements for spectral peak width (A), peak frequency (B), and peak amplitude (C). The distributions depict two sets of 98 unrelated individuals (Set1 and Set2) and measurements from the left (L), middle (M), and right (R) parieto-occipital region.

**Supplementary Table 1.** List of annotated loci in the linkage peak region on chromosome 10.

| Gene         | Start position | End position | Length  | Strand | Shown in Fig. 5B | Description                                                                                   |
|--------------|----------------|--------------|---------|--------|------------------|-----------------------------------------------------------------------------------------------|
| LOC642361    | 79825901       | 79827602     | 1701    | +      |                  | H. sapiens uncharacterized LOC642361 (LOC642361), long non-coding RNA.                        |
| LOC100288974 | 79904897       | 79931818     | 26921   | +      |                  | H. sapiens BMS1 homolog, ribosome assembly protein pseudogene (LOC100288974), non-coding RNA. |
| MBL1P        | 79920177       | 79923119     | 2942    | +      |                  | H. sapiens mannose-binding lectin (protein A) 1, pseudogene (MBL1P), non-coding RNA.          |
| SFTPD        | 79937739       | 79949105     | 11366   | -      | yes              | H. sapiens surfactant protein D (SFTPD), mRNA.                                                |
| DQ600650     | 79967725       | 79967755     | 30      | -      |                  | H. sapiens piRNA piR-38716, complete sequence.                                                |
| TMEM254-AS1  | 80046232       | 80079193     | 32961   | -      |                  | H. sapiens TMEM254 antisense RNA 1 (TMEM254-AS1), long non-coding RNA.                        |
| TMEM254      | 80078645       | 80092551     | 13906   | +      | yes              | H. sapiens transmembrane protein 254 (TMEM254), mRNA.                                         |
| PLAC9        | 80132501       | 80145028     | 12527   | +      | yes              | H. sapiens placenta-specific 9 (PLAC9), mRNA.                                                 |
| ANXA11       | 80155123       | 80205677     | 50554   | -      | yes              | H. sapiens annexin A11 (ANXA11), mRNA.                                                        |
| LINC00857    | 80207709       | 80219657     | 11948   | +      |                  | H. sapiens long intergenic non-protein coding RNA 857 (LINC00857), long non-coding RNA.       |
| MAT1A        | 80271819       | 80289678     | 17859   | -      | yes              | H. sapiens methionine adenosyltransferase I, alpha (MAT1A), mRNA.                             |
| DQ596630     | 80315952       | 81506316     | 1190364 | -      |                  | H. sapiens piRNA piR-34696, complete sequence.                                                |
| DYDC1        | 80336105       | 80356758     | 20653   | -      | yes              | H. sapiens DPY30 domain containing 1 (DYDC1), mRNA.                                           |
| DYDC2        | 80344744       | 80368073     | 23329   | +      |                  | H. sapiens DPY30 domain containing 2 (DYDC2), non-coding RNA.                                 |
| FAM213A      | 80407828       | 80432997     | 25169   | +      | yes              | H. sapiens family with sequence similarity 213, member A (FAM213A), mRNA.                     |
| TSPAN14      | 80454281       | 80522635     | 68354   | +      | yes              | H. sapiens tetraspanin 14 (TSPAN14), mRNA.                                                    |
| DQ580663     | 80533443       | 80533474     | 31      | -      |                  | H. sapiens piRNA piR-48775, complete sequence.                                                |
| SH2D4B       | 80537901       | 80646560     | 108659  | +      | yes              | H. sapiens SH2 domain containing 4B (SH2D4B), mRNA.                                           |
| DQ596066     | 80990481       | 80990508     | 27      | +      |                  | H. sapiens piRNA piR-34132, complete sequence.                                                |
| JC172275     | 81144701       | 81144721     | 20      | +      |                  | Sequence 647 from Patent WO2013150303.                                                        |
| DQ597498     | 81308912       | 81308941     | 29      | +      |                  | H. sapiens piRNA piR-35564, complete sequence.                                                |
| DQ593458     | 81337389       | 81337417     | 28      | +      |                  | H. sapiens piRNA piR-33570, complete sequence.                                                |
| Mir_544      | 81707488       | 84863362     | 3155874 | -      |                  | Rfam model RF01045 hit found at contig region AL096704.9/33537-33432                          |
| DQ596939     | 81862486       | 90832018     | 8969532 | +      |                  | H. sapiens piRNA piR-35005, complete sequence.                                                |

|           |          |          |         |   |     |                                                                                                 |
|-----------|----------|----------|---------|---|-----|-------------------------------------------------------------------------------------------------|
| NRG3*     | 81875313 | 82987179 | 1111866 | + | yes | H. sapiens neuregulin 3 (NRG3), mRNA.                                                           |
| L13713    | 81963198 | 81963433 | 235     | - |     | Human scRNA molecule, transcribed from Alu repeat.                                              |
| U6        | 82340770 | 90922835 | 8582065 | + |     | Rfam model RF00026 hit found at contig region AL391478.14/36142-36247                           |
| DQ578550  | 82478467 | 84347072 | 1868605 | - |     | H. sapiens piRNA piR-46662, complete sequence.                                                  |
| DQ594187  | 82678511 | 82678541 | 30      | + |     | H. sapiens piRNA piR-60299, complete sequence.                                                  |
| DQ587130  | 83378138 | 91979117 | 8600979 | + |     | H. sapiens piRNA piR-54242, complete sequence.                                                  |
| JC172208  | 83835569 | 90382781 | 6547212 | - |     | Sequence 580 from Patent WO2013150303.                                                          |
| GHITM     | 84139428 | 84153555 | 14127   | + | yes | H. sapiens growth hormone inducible transmembrane protein (GHITM), mRNA.                        |
| BC051760  | 84167227 | 84172076 | 4849    | - |     | H. sapiens cDNA clone IMAGE:5723642, partial cds.                                               |
| C10orf99  | 84173797 | 84185294 | 11497   | + |     | H. sapiens chromosome 10 open reading frame 99 (C10orf99), mRNA.                                |
| CDHR1     | 84194634 | 84219620 | 24986   | + | yes | H. sapiens cadherin-related family member 1 (CDHR1), mRNA.                                      |
| LRIT2     | 84220490 | 84225589 | 5099    | - | yes | H. sapiens leucine-rich repeat, immunoglobulin-like and transmembrane domains 2 (LRIT2), mRNA.  |
| LRIT1     | 84231519 | 84241461 | 9942    | - | yes | H. sapiens leucine-rich repeat, immunoglobulin-like and transmembrane domains 1 (LRIT1), mRNA.  |
| LRRC21    | 84241407 | 84241582 | 175     | - |     | H. sapiens leucine rich repeat containing 21 (LRRC21) mRNA, partial cds, alternatively spliced. |
| RGR       | 84245052 | 84259188 | 14136   | + | yes | H. sapiens retinal G protein coupled receptor (RGR), mRNA.                                      |
| LINC00858 | 84279979 | 84294659 | 14680   | + |     | H. sapiens long intergenic non-protein coding RNA 858 (LINC00858), long non-coding RNA.         |
| CCSER2    | 84328588 | 84518521 | 189933  | + | yes | H. sapiens coiled-coil serine-rich protein 2 (CCSER2), mRNA.                                    |
| DD413707  | 84391161 | 84391181 | 20      | + |     | Regulation of Mammalian Cells.                                                                  |
| U02063    | 84888606 | 92398493 | 7509887 | + |     | Human clone 4 Alu repeat mRNA sequence.                                                         |
| JC172250  | 84931312 | 84931333 | 21      | - |     | Sequence 622 from Patent WO2013150303.                                                          |
| JC172329  | 85156167 | 85156187 | 20      | + |     | Sequence 701 from Patent WO2013150303.                                                          |
| AK097624  | 85193420 | 85198938 | 5518    | - |     | H. sapiens cDNA FLJ40305 fis, clone TESTI2029244.                                               |
| DQ578736  | 85410379 | 85410409 | 30      | + |     | H. sapiens piRNA piR-46848, complete sequence.                                                  |
| GRID1-AS1 | 85577730 | 85607215 | 29485   | + |     | H. sapiens GRID1 antisense RNA 1 (GRID1-AS1), long non-coding RNA.                              |
| GRID1*    | 85599554 | 86366493 | 766939  | - | yes | H. sapiens glutamate receptor, ionotropic, delta 1 (GRID1), mRNA.                               |
| AX746544  | 85644072 | 85648066 | 3994    | + |     | Sequence 69 from Patent EP1308459.                                                              |
| 7SK       | 85650011 | 85650260 | 249     | - |     | Rfam model RF00100 hit found at contig region AC022028.7/89017-88769                            |
| DQ578393  | 86107590 | 86107619 | 29      | - |     | H. sapiens piRNA piR-46505, complete sequence.                                                  |
| DQ589229  | 86118439 | 86118466 | 27      | - |     | H. sapiens piRNA piR-56341, complete sequence.                                                  |

|            |          |          |        |   |     |                                                                                              |
|------------|----------|----------|--------|---|-----|----------------------------------------------------------------------------------------------|
| MIR346     | 86264693 | 86264788 | 95     | - |     | H. sapiens microRNA 346 (MIR346), microRNA.                                                  |
| WAPAL      | 86435255 | 86521784 | 86529  | - | yes | H. sapiens wings apart-like homolog (Drosophila) (WAPAL), mRNA.                              |
| DQ591044   | 86455398 | 86455441 | 43     | + |     | H. sapiens piRNA piR-58156, complete sequence.                                               |
| WAPL       | 86521615 | 86521739 | 124    | - |     | H. sapiens WAPL mRNA for wings apart-like homolog variant 18, partial cds.                   |
| OPN4       | 86654556 | 86666848 | 12292  | + | yes | H. sapiens opsin 4 (OPN4), mRNA.                                                             |
| LDB3       | 86666793 | 86736067 | 69274  | + | yes | H. sapiens LIM domain binding 3 (LDB3), mRNA.                                                |
| AX747977   | 86732391 | 86735252 | 2861   | + |     | Sequence 1502 from Patent EP1308459.                                                         |
| BMPR1A     | 86756638 | 86925188 | 168550 | + | yes | H. sapiens bone morphogenetic protein receptor, type IA (BMPR1A), mRNA.                      |
| AB120919   | 86864329 | 86864911 | 582    | + |     | H. sapiens RNA transcript, HERV-H env, isolate:CHE11-8.                                      |
| MMRN2      | 86935540 | 86957668 | 22128  | - | yes | H. sapiens multimerin 2 (MMRN2), mRNA.                                                       |
| SNCG       | 86958530 | 86963260 | 4730   | + | yes | H. sapiens synuclein, gamma (breast cancer-specific protein 1) (SNCG), mRNA.                 |
| AL157440   | 86967156 | 86970814 | 3658   | - |     | H. sapiens mRNA; cDNA DKFZp434C185 (from clone DKFZp434C185).                                |
| ADIRF      | 86968430 | 86970909 | 2479   | + | yes | H. sapiens adipogenesis regulatory factor (ADIRF), mRNA.                                     |
| AGAP11     | 86970740 | 87024730 | 53990  | + | yes | H. sapiens ankyrin repeat and GTPase domain Arf GTPase activating protein 11 (AGAP11), mRNA. |
| FAM25A     | 87020288 | 87024730 | 4442   | + | yes | H. sapiens family with sequence similarity 25, member A (FAM25A), mRNA.                      |
| GLUD1      | 87050201 | 87095019 | 44818  | - | yes | H. sapiens glutamate dehydrogenase 1 (GLUD1), mRNA.                                          |
| DQ588547   | 87080367 | 87080394 | 27     | + |     | H. sapiens piRNA piR-55659, complete sequence.                                               |
| DQ601422   | 87080474 | 87080506 | 32     | + |     | H. sapiens piRNA piR-39488, complete sequence.                                               |
| FAM35A     | 87095195 | 87191465 | 96270  | + | yes | H. sapiens family with sequence similarity 35, member A (FAM35A), mRNA.                      |
| NUTM2A-AS1 | 87205787 | 87342558 | 136771 | - |     | H. sapiens NUTM2A antisense RNA 1 (NUTM2A-AS1), long non-coding RNA.                         |
| NUTM2A     | 87225447 | 87234976 | 9529   | + | yes | H. sapiens NUT family member 2A (NUTM2A), mRNA.                                              |
| LOC439994  | 87342410 | 87343574 | 1164   | + |     | H. sapiens uncharacterized LOC439994 (LOC439994), long non-coding RNA.                       |
| BC082979   | 87342921 | 87357301 | 14380  | + |     | H. sapiens cDNA clone IMAGE:6575899.                                                         |
| NUTM2D     | 87357719 | 87370695 | 12976  | + |     | H. sapiens NUT family member 2D (NUTM2D), non-coding RNA.                                    |
| LINC00864  | 87396573 | 87407700 | 11127  | - |     | H. sapiens long intergenic non-protein coding RNA 864 (LINC00864), long non-coding RNA.      |
| MIR4678    | 87503880 | 87503954 | 74     | + |     | H. sapiens microRNA 4678 (MIR4678), microRNA.                                                |
| MINPP1     | 87504465 | 87553461 | 48996  | + | yes | H. sapiens multiple inositol-polyphosphate phosphatase 1 (MINPP1), mRNA.                     |
| PAPSS2     | 87659718 | 87747705 | 87987  | + | yes | H. sapiens 3'-phosphoadenosine 5'-phosphosulfate synthase 2 (PAPSS2), mRNA.                  |
| ATAD1*     | 87753117 | 87818160 | 65043  | - | yes | H. sapiens ATPase family, AAA domain containing 1 (ATAD1), mRNA.                             |

|           |          |          |        |   |     |                                                                                          |
|-----------|----------|----------|--------|---|-----|------------------------------------------------------------------------------------------|
| CFL1P1    | 87818312 | 87845612 | 27300  | + |     | H. sapiens cofilin 1 (non-muscle) pseudogene 1 (CFL1P1), non-coding RNA.                 |
| KLLN      | 87859160 | 87863437 | 4277   | - | yes | H. sapiens killin, p53-regulated DNA replication inhibitor (KLLN), mRNA.                 |
| PTEN      | 87863437 | 87968775 | 105338 | + | yes | H. sapiens phosphatase and tensin homolog (PTEN), mRNA.                                  |
| AK130076  | 87947167 | 87948937 | 1770   | + |     | H. sapiens cDNA FLJ26566 fis, clone LNF05224.                                            |
| RNLS      | 88132299 | 88583325 | 451026 | - | yes | H. sapiens renalase, FAD-dependent amine oxidase (RNLS), mRNA.                           |
| LIPJ      | 88586761 | 88606976 | 20215  | + | yes | H. sapiens lipase, family member J (LIPJ), mRNA.                                         |
| LIPF      | 88664388 | 88678815 | 14427  | + | yes | H. sapiens lipase, gastric (LIPF), mRNA.                                                 |
| LIPK      | 88724543 | 88752756 | 28213  | + | yes | H. sapiens lipase, family member K (LIPK), mRNA.                                         |
| LIPN      | 88761405 | 88778242 | 16837  | + | yes | H. sapiens lipase, family member N (LIPN), mRNA.                                         |
| LIPM      | 88802729 | 88820546 | 17817  | + | yes | H. sapiens lipase, family member M (LIPM), mRNA.                                         |
| ANKRD22   | 88819901 | 88851975 | 32074  | - | yes | H. sapiens ankyrin repeat domain 22 (ANKRD22), mRNA.                                     |
| STAMBPL1  | 88880186 | 88975153 | 94967  | + | yes | H. sapiens STAM binding protein-like 1 (STAMBPL1), mRNA.                                 |
| BC069782  | 88908170 | 88909397 | 1227   | + |     | H. sapiens cDNA clone IMAGE:7262608, with apparent retained intron.                      |
| AX748062  | 88932683 | 88939974 | 7291   | + |     | Sequence 1587 from Patent EP1308459.                                                     |
| ACTA2     | 88935073 | 88991390 | 56317  | - | yes | H. sapiens actin, alpha 2, smooth muscle, aorta (ACTA2), mRNA.                           |
| FAS       | 88969795 | 89015785 | 45990  | + | yes | H. sapiens Fas cell surface death receptor (FAS), mRNA.                                  |
| FAS-AS1   | 88991423 | 88992975 | 1552   | - |     | H. sapiens FAS antisense RNA 1 (FAS-AS1), long non-coding RNA.                           |
| HV303528  | 89003030 | 89003059 | 29     | - |     | JP 2009535045-A/390: Short interfering ribonucleic acid (siRNA) for oral administration. |
| HV303525  | 89003107 | 89003177 | 70     | - |     | JP 2009535045-A/387: Short interfering ribonucleic acid (siRNA) for oral administration. |
| MIR4679-2 | 89063334 | 89063411 | 77     | - |     | H. sapiens microRNA 4679-2 (MIR4679-2), microRNA.                                        |
| MIR4679-1 | 89063335 | 89063410 | 75     | + |     | H. sapiens microRNA 4679-1 (MIR4679-1), microRNA.                                        |
| DQ571824  | 89072713 | 89072741 | 28     | + |     | H. sapiens piRNA piR-31936, complete sequence.                                           |
| CH25H     | 89205936 | 89207314 | 1378   | - | yes | H. sapiens cholesterol 25-hydroxylase (CH25H), mRNA.                                     |
| LIPA      | 89213568 | 89414625 | 201057 | - | yes | H. sapiens lipase A, lysosomal acid, cholesterol esterase (LIPA), mRNA.                  |
| BC040833  | 89277663 | 89342674 | 65011  | - |     | H. sapiens cDNA clone IMAGE:5299308.                                                     |
| IFIT2     | 89301948 | 89309276 | 7328   | + | yes | H. sapiens interferon-induced protein with tetratricopeptide repeats 2 (IFIT2), mRNA.    |
| IFIT3     | 89327818 | 89340968 | 13150  | + | yes | H. sapiens interferon-induced protein with tetratricopeptide repeats 3 (IFIT3), mRNA.    |
| IFIT1B    | 89378055 | 89385205 | 7150   | + | yes | H. sapiens interferon-induced protein with tetratricopeptide repeats 1B (IFIT1B), mRNA.  |
| IFIT1     | 89392545 | 89406487 | 13942  | + | yes | H. sapiens interferon-induced protein with tetratricopeptide repeats 1 (IFIT1), mRNA.    |

|              |          |          |        |   |     |                                                                                                      |
|--------------|----------|----------|--------|---|-----|------------------------------------------------------------------------------------------------------|
| IFIT5        | 89414567 | 89421002 | 6435   | + | yes | H. sapiens interferon-induced protein with tetratricopeptide repeats 5 (IFIT5), mRNA.                |
| SLC16A12     | 89430293 | 89535556 | 105263 | - | yes | H. sapiens solute carrier family 16, member 12 (SLC16A12), mRNA.                                     |
| PANK1        | 89579496 | 89645572 | 66076  | - | yes | H. sapiens pantothenate kinase 1 (PANK1), mRNA.                                                      |
| MIR107       | 89592746 | 89592827 | 81     | - |     | H. sapiens microRNA 107 (MIR107), microRNA.                                                          |
| JB620946     | 89592757 | 89592778 | 21     | + |     | Sequence 926 from Patent WO2013063544.                                                               |
| FLJ37201     | 89691299 | 89697928 | 6629   | - |     | H. sapiens tigger transposable element derived 2 pseudogene (FLJ37201), non-coding RNA.              |
| KIF20B       | 89701589 | 89774943 | 73354  | + | yes | H. sapiens kinesin family member 20B (KIF20B), mRNA.                                                 |
| KRMP1        | 89733055 | 89733261 | 206    | + |     | H. sapiens KRMP1 mRNA for mitotic kinesin-related protein, partial cds, alternative exon sequence.   |
| DQ595025     | 89746224 | 89746252 | 28     | - |     | H. sapiens piRNA piR-61137, complete sequence.                                                       |
| LINC00865    | 89829492 | 89840861 | 11369  | + |     | H. sapiens long intergenic non-protein coding RNA 865 (LINC00865), long non-coding RNA.              |
| AK093219     | 89915488 | 89957373 | 41885  | - |     | H. sapiens cDNA FLJ35900 fis, clone TESTI2009545.                                                    |
| DQ571826     | 90234540 | 90234566 | 26     | - |     | H. sapiens piRNA piR-31938, complete sequence.                                                       |
| BC037970     | 90454168 | 90501437 | 47269  | + |     | H. sapiens, clone IMAGE:4520798, mRNA.                                                               |
| HTR7*        | 90740818 | 90857914 | 117096 | - | yes | H. sapiens 5-hydroxytryptamine (serotonin) receptor 7, adenylate cyclase-coupled (HTR7), mRNA.       |
| RPP30        | 90871517 | 90908555 | 37038  | + | yes | H. sapiens ribonuclease P/MRP 30kDa subunit (RPP30), mRNA.                                           |
| ANKRD1       | 90912099 | 90921275 | 9176   | - | yes | H. sapiens ankyrin repeat domain 1 (cardiac muscle) (ANKRD1), mRNA.                                  |
| LINC00502    | 91045807 | 91062159 | 16352  | + |     | H. sapiens long intergenic non-protein coding RNA 502 (LINC00502), long non-coding RNA.              |
| NUDT9P1      | 91152005 | 91153080 | 1075   | - |     | H. sapiens nudix-type motif 9 pseudogene 1 (NUDT9P1), non-coding RNA.                                |
| PCGF5        | 91163011 | 91284331 | 121320 | + | yes | H. sapiens polycomb group ring finger 5 (PCGF5), mRNA.                                               |
| LOC100188947 | 91306961 | 91611460 | 304499 | - |     | H. sapiens uncharacterized LOC100188947 (LOC100188947), long non-coding RNA.                         |
| HECTD2       | 91410284 | 91514828 | 104544 | + | yes | H. sapiens HECT domain containing E3 ubiquitin protein ligase 2 (HECTD2), mRNA.                      |
| PPP1R3C      | 91628439 | 91633101 | 4662   | - | yes | H. sapiens protein phosphatase 1, regulatory subunit 3C (PPP1R3C), mRNA.                             |
| TNKS2-AS1    | 91782838 | 91798291 | 15453  | - |     | H. sapiens TNKS2 antisense RNA 1 (head to head) (TNKS2-AS1), long non-coding RNA.                    |
| TNKS2        | 91798393 | 91865475 | 67082  | + | yes | H. sapiens tankyrase, TRF1-interacting ankyrin-related ADP-ribose polymerase 2 (TNKS2), mRNA.        |
| Mir_584      | 91832324 | 91832444 | 120    | - |     | Rfam model RF01016 hit found at contig region AL359707.18/98081-97962                                |
| FGFBP3       | 91906587 | 91909501 | 2914   | - | yes | H. sapiens fibroblast growth factor binding protein 3 (FGFBP3), mRNA.                                |
| BTA1F1       | 91923978 | 92030323 | 106345 | + | yes | H. sapiens BTA1F1 RNA polymerase II, B-TFIID transcription factor-associated, 170kDa (BTA1F1), mRNA. |
| L13714       | 91973622 | 91973740 | 118    | + |     | Human scRNA molecule, transcribed from Alu repeat.                                                   |
| CPEB3        | 92048639 | 92291118 | 242479 | - | yes | H. sapiens cytoplasmic polyadenylation element binding protein 3 (CPEB3), mRNA.                      |

|                |          |          |       |   |     |                                                                         |
|----------------|----------|----------|-------|---|-----|-------------------------------------------------------------------------|
| SNORA25        | 92076241 | 92076365 | 124   | + |     | Rfam model RF00402 hit found at contig region AL365398.22/87452-87575   |
| CPEB3_ribozyme | 92204228 | 92204306 | 78    | - |     | Rfam model RF00622 hit found at contig region AL158040.14/122218-122141 |
| MARCH5         | 92291162 | 92353964 | 62802 | + | yes | H. sapiens membrane-associated ring finger (C3HC4) 5 (MARCH5), mRNA.    |
| DQ586320       | 92377157 | 92377234 | 77    | + |     | H. sapiens piRNA piR-53432, complete sequence.                          |
